# Supplementary material for: Impact of Pregnancy on Self-Efficacy and Personal Competence in the Context of Risk of Depression, Mental Health Status, and Satisfaction with Life
Source: MDPI journal article supplement (doi:10.3390/jcm13020533), 2024-01-17
Supplement: s1 [file s1]

**Table S1.** Correlations between BDI and SWLS and age of women from different countries.

| Country | Pregnant women               |                              |
|---------|------------------------------|------------------------------|
|         | Age vs BDI                   | Age vs SWLS                  |
| Belarus | $r = -0.02$ ( $p = 0.8221$ ) | $r = -0.12$ ( $p = 0.1432$ ) |
| Poland  | $r = -0.07$ ( $p = 0.3839$ ) | $r = 0.03$ ( $p = 0.6893$ )  |
| Greece  | $r = -0.03$ ( $p = 0.7619$ ) | $r = -0.04$ ( $p = 0.6572$ ) |
| Turkey  | $r = -0.08$ ( $p = 0.4137$ ) | $r = 0.03$ ( $p = 0.7591$ )  |
| Russia  | $r = -0.12$ ( $p = 0.4323$ ) | $r = -0.06$ ( $p = 0.6945$ ) |

**Table S2.** History of spontaneous and induced abortions.

|                       | Belarus<br>N =250  |            | Poland<br>N =308  |            | Greece<br>N =230  |            | Turkey<br>N =210  |            | Russia<br>N =95  |            |
|-----------------------|--------------------|------------|-------------------|------------|-------------------|------------|-------------------|------------|------------------|------------|
|                       | Pregnant           | Postpartum | Pregnant          | Postpartum | Pregnant          | Postpartum | Pregnant          | Postpartum | Pregnant         | Postpartum |
|                       | N = 147            | N = 103    | N = 173           | N = 163    | N = 114           | N = 106    | N = 103           | N = 107    | N = 47           | N = 48     |
| Spontaneous abortions |                    |            |                   |            |                   |            |                   |            |                  |            |
| None                  | 125                | 87         | 134               | 129        | 87                | 75         | 121               | 107        | 38               | 40         |
| yes                   | 22                 | 16         | 37                | 34         | 27                | 31         | 29                | 0          | 9                | 8          |
| 1 miscarriage         | 19                 | 14         | 30                | 26         | 25                | 26         | 17                | 0          | 9                | 8          |
| 2 miscarriages        | 1                  | 2          | 4                 | 4          | 2                 | 5          | 11                | 0          | 0                | 0          |
| 3 miscarriages        | 2                  | 0          | 3                 | 4          | 0                 | 0          | 1                 | 0          | 0                | 0          |
| Total                 | 147                | 103        | 171               | 163        | 114               | 106        | 103               | 107        | 47               | 48         |
| Induced abortions     |                    |            |                   |            |                   |            |                   |            |                  |            |
|                       | Belarus<br>N = 250 |            | Poland<br>N = 308 |            | Greece<br>N = 230 |            | Turkey<br>N = 210 |            | Russia<br>N = 95 |            |
|                       | Pregnant           | Postpartum | Pregnant          | Postpartum | Pregnant          | Postpartum | Pregnant          | Postpartum | Pregnant         | Postpartum |
|                       | N =147             | N =103     | N =173            | N =163     | N =114            | N =106     | N =103            | N =107     | N =47            | N =48      |
| None                  | 130                | 91         | 171               | 163        | 104               | 95         | 94                | 107        | 44               | 46         |
| yes                   | 17                 | 12         | 0                 | 0          | 10                | 11         | 9                 | 0          | 3                | 2          |
| 1 miscarriage         | 12                 | 10         | 0                 | 0          | 7                 | 7          | 9                 | 0          | 2                | 2          |
| 2 miscarriages        | 3                  | 1          | 0                 | 0          | 3                 | 2          | 0                 | 0          | 1                | 0          |
| 3 miscarriages        | 2                  | 0          | 0                 | 0          | 0                 | 2          | 0                 | 0          | 0                | 0          |
| 5 miscarriages        | 0                  | 1          | 0                 | 0          | 0                 | 0          | 0                 | 0          | 0                | 0          |
| Total                 | 147                | 103        | 171               | 163        | 114               | 106        | 103               | 107        | 47               | 48         |

**Table S3.** Correlations between BDI and SWLS and having children among women, including pregnant women from each country.

| Having children                              |           |    |     |           |      |     |           |    |      |           |    |     |           |     |     |
|----------------------------------------------|-----------|----|-----|-----------|------|-----|-----------|----|------|-----------|----|-----|-----------|-----|-----|
|                                              | Belarus   |    |     | Poland    |      |     | Greece    |    |      | Turkey    |    |     | Russia    |     |     |
| no                                           | 48.3%     |    |     | 43.4%     |      |     | 16.7%     |    |      | 58.3%     |    |     | 61.7%     |     |     |
| yes                                          | 51.7%     |    |     | 56.6%     |      |     | 83.3%     |    |      | 41.7%     |    |     | 38.3%     |     |     |
| Average number of children                   | 1.5       |    |     | 1.7       |      |     | 2.0       |    |      | 1.6       |    |     | 1.2       |     |     |
| Beck Depression Inventory vs Having children |           |    |     |           |      |     |           |    |      |           |    |     |           |     |     |
|                                              | Belarus   |    |     | Poland    |      |     | Greece    |    |      | Turkey    |    |     | Russia    |     |     |
|                                              | $\bar{x}$ | Me | IQR | $\bar{x}$ | Me   | IQR | $\bar{x}$ | Me | IQR  | $\bar{x}$ | Me | IQR | $\bar{x}$ | Me  | IQR |
| yes                                          | 6.4       | 5  | 7.0 | 6.0       | 4    | 7.0 | 8.2       | 7  | 8.0  | 9.2       | 9  | 8.0 | 7.1       | 5   | 6.0 |
| no                                           | 6.0       | 5  | 5.0 | 5.8       | 5    | 7.0 | 8.9       | 9  | 5.0  | 7.9       | 8  | 5.0 | 7.9       | 6.5 | 7.0 |
| $p$                                          | 0.9074    |    |     | 0.6603    |      |     | 0.3549    |    |      | 0.1830    |    |     | 0.5701    |     |     |
| SWLS vs Having children                      |           |    |     |           |      |     |           |    |      |           |    |     |           |     |     |
|                                              | Belarus   |    |     | Poland    |      |     | Greece    |    |      | Turkey    |    |     | Russia    |     |     |
|                                              | $\bar{x}$ | Me | IQR | $\bar{x}$ | Me   | IQR | $\bar{x}$ | Me | IQR  | $\bar{x}$ | Me | IQR | $\bar{x}$ | Me  | IQR |
| yes                                          | 26.1      | 26 | 7.0 | 25.1      | 25.5 | 7.0 | 25.2      | 26 | 9.0  | 27.7      | 28 | 5.0 | 25.4      | 26  | 9.0 |
| no                                           | 26.8      | 27 | 6.0 | 25.3      | 25   | 7.0 | 24.4      | 27 | 12.0 | 29.2      | 29 | 4.0 | 26.8      | 27  | 5.0 |
| $p$                                          | 0.3390    |    |     | 0.9987    |      |     | 0.7600    |    |      | 0.0623    |    |     | 0.3888    |     |     |

Notes  $\bar{x}$  – Mean , Me – Median, IQR- interquartile range
